# Supplementary material
Source: ML conference proceedings conference paper supplement (https://aclanthology.org/2019.icon-1.28)
Supplement: OptionalSupplementaryMaterial [file 2019.icon-1.28.OptionalSupplementaryMaterial.zip]

## APPENDIX

## Anonymous ACL submission

## A Dependency Graphs for Answer Generation

In Section 2.2, we have set of rules to obtain the answer with help of dependency parser (?). In this section, we see the examples of how they are extracted for various question types:

**Karta:** The answer to the question *kIsnE zyAma kO kalama dI?* [Karta Question Type] answer will be *rAma nE* (refer Figure 1).

**Karma:** The answer to the question *siMha ne kiskO apnA dostA banAyA?* [Karma Question Type] answer will be *cUhE kO* (refer Figure 2). The answer to the question *sIta kaba pathzAlA gayI?* [Time Question Type] answer will be *subah* (refer Figure 3).

**Loc:** The answer to the question *sIta kaha gayI?* [Loc Question Type] answer will be *payhzAla* (refer Figure 3).

**Recipient:** The answer to the question *rAma ne kisE kalama dI?* [Recipient Question Type] answer will be *zyAma* (refer Figure 1).

**Adj\_Noun:** The answer to the question *kalama kaisI hai?* [Adj\_Noun Question Type] answer will be *suNdara* (refer Figure 5).

**Intf:** The answer to the question *rAma ne kitnE kalama dIyE?* [Intf Question Type] answer will be *Eka* (refer Figure 1).

**Kya:** The answer to the question *rAmA nE kyA dIyA?* [Kya Question Type] answer will be *kalama* (refer Figure 1).

**Kiske:** The answer to the question *kauvA kiske talAza meM udA?* [Kiske Question Type] answer will be *pAnI* (refer Figure 4).

**Kiska:** The answer to the question *yaha kalama kiskI hai?* [Kiska Question Type] answer will be *rAma* (refer Figure 5).

**GivenNew:** The answer to the question *jaba rAma billI kE pAsa gayA taba kyA huA?* [GivenKnown Question Type] the answer is

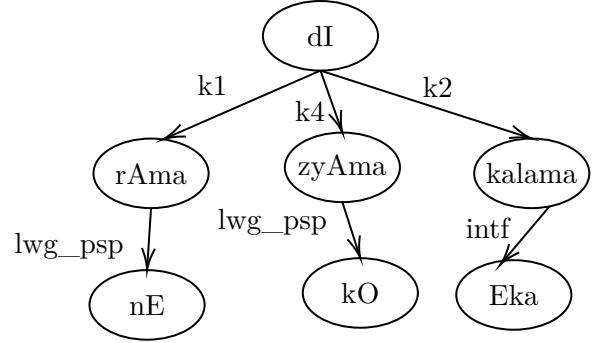

Figure 1: Karta, Recipient, Intf and Kya

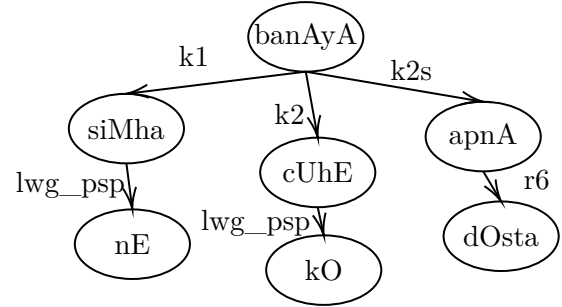

Figure 2: Karma

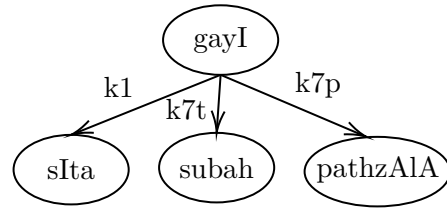

Figure 3: Loc and Time

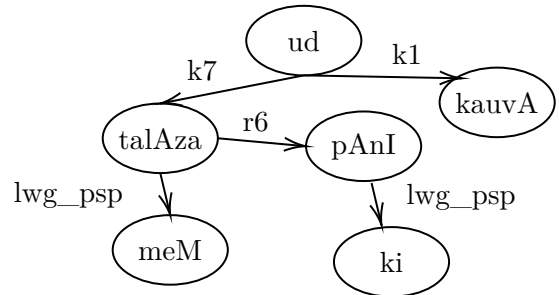

Figure 4: Kiske

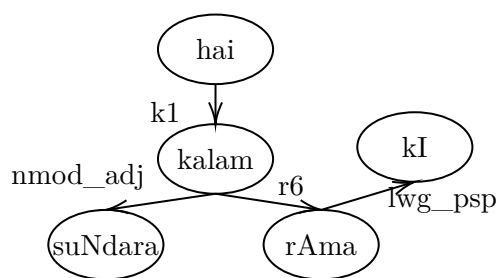

Figure 5: Kiska, Adj\_Noun

billI bhAga gaI. (See Figure 2 in Section 2.2  
Question Answering Part)
